# Supplementary material
Source: publisher figshare collection journal article supplement (https://tandf.figshare.com/ndownloader/files/22351398)
Supplement: Supplementary file 1 [file 22351398]

**Journal:** International Journal of Environmental Analytical Chemistry

**Title:** Electrochemical detection of Cr(VI) and Cr(III) ions present in aqueous solutions using bio-modified carbon paste electrode: A voltammetric study

**Authors:** Divyasree C. Prabhakaran, Praveen C. Ramamurthy, Yann Sivry and S. Subramanian

**Corresponding author**: S. Subramanian

Department of Materials Engineering,

Indian Institute of Science,

Bangalore-560012, Karnataka, India.

Contact no.: 91-80-22932261

Email: [ssmani@iisc.ac.in](mailto:ssmani@iisc.ac.in)

**SUPPLEMENTARY MATERIAL**

***
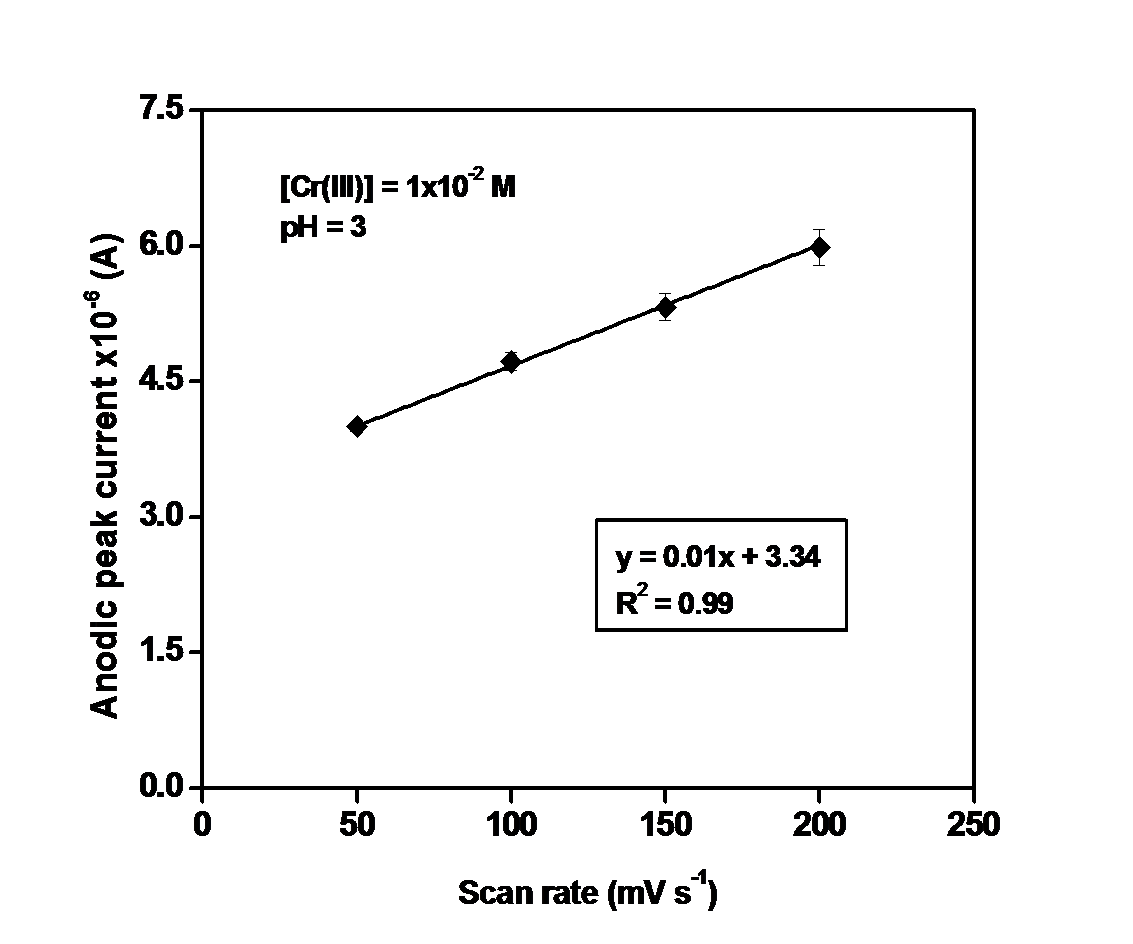

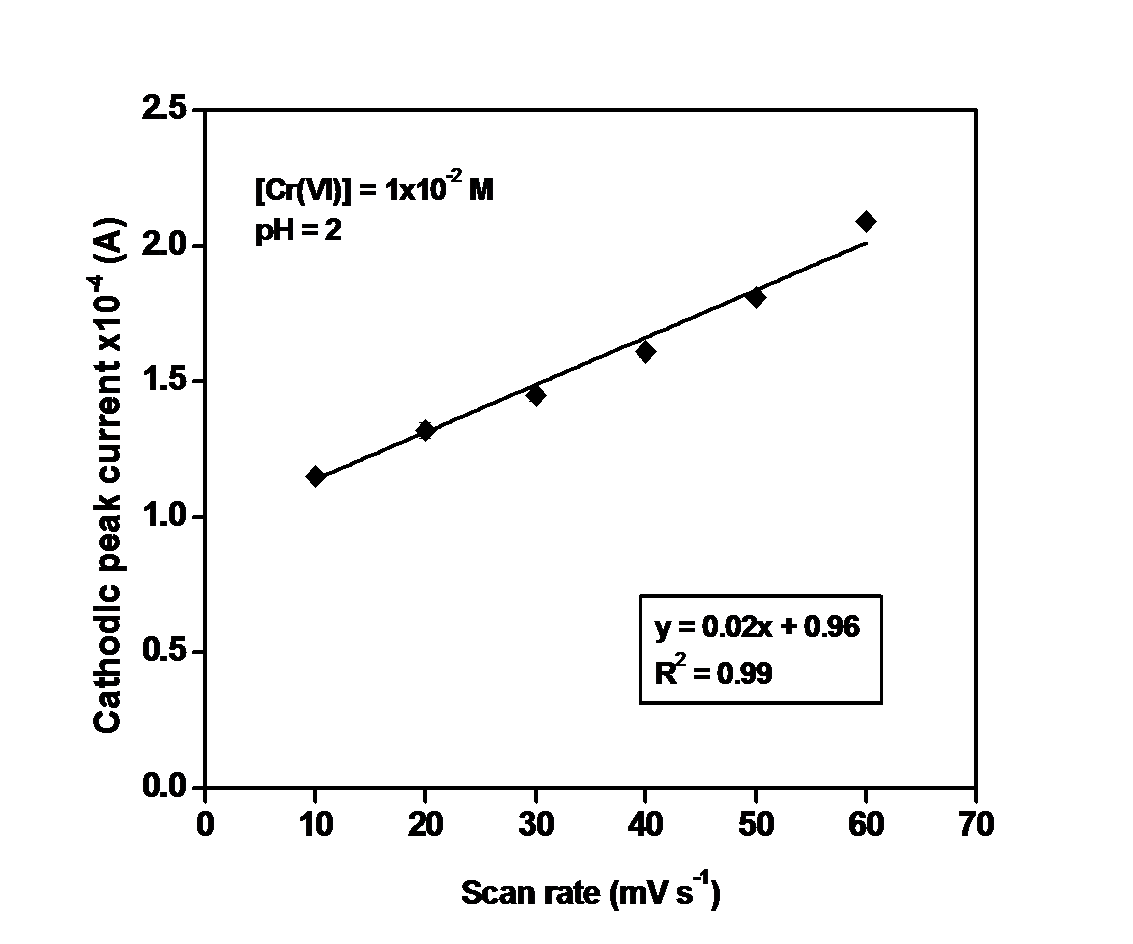
*Figure S1**

**(b)**

**(a)**

Figure S1. Linear fit plots of peak current as a function of scan rate for the detection of: (a) Cr(VI) and (b) Cr(III) ions


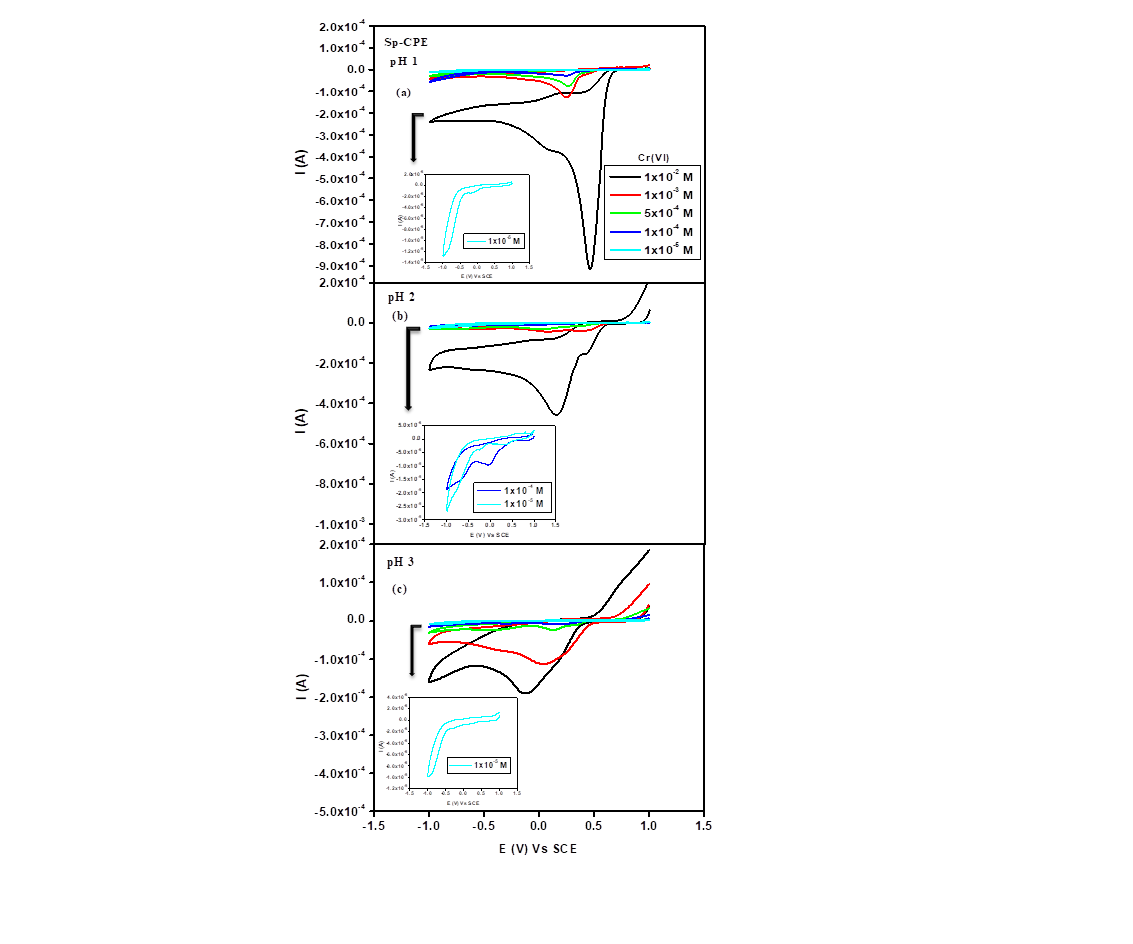
Figure S2

Figure S2. Cyclic voltammetric detection of Cr(VI) using Sp-CPE as a function Cr(VI) concentration at: (a) pH 1; (b) pH 2 and (c) pH 3

Figure S3

**
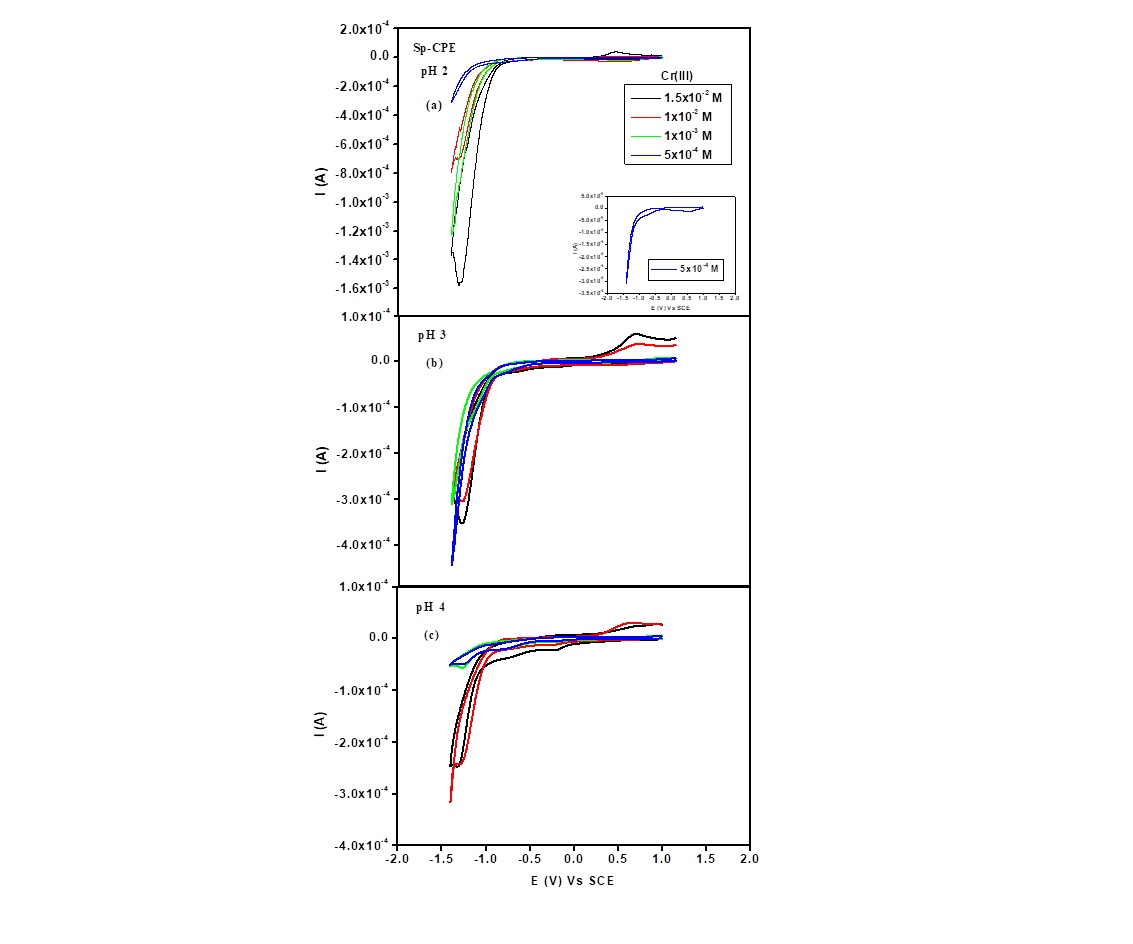
**

Figure S3. Cyclic voltammetric detection of Cr(III) using Sp-CPE as a function Cr(III) concentration at: (a) at pH 2; (b) pH 3 and (c) pH 4


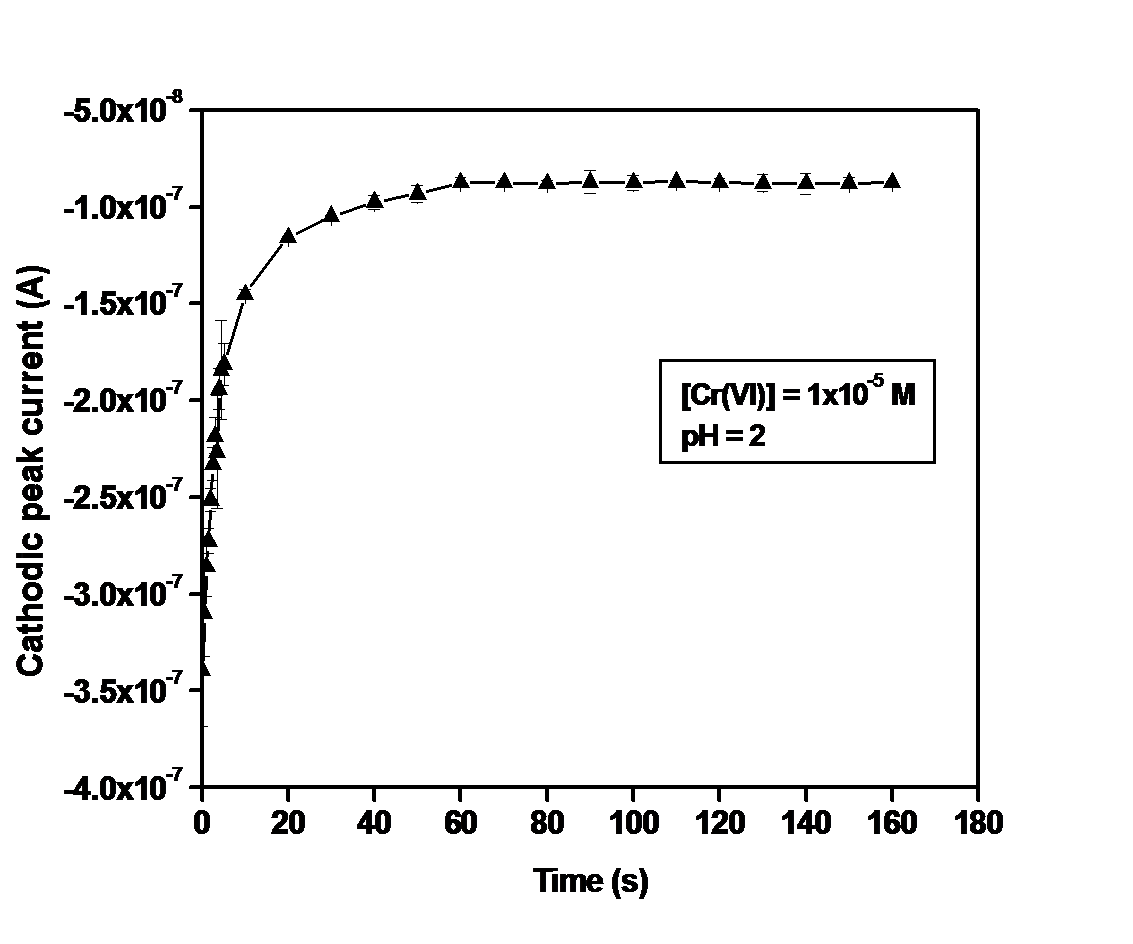
Figure S4

**(a)**


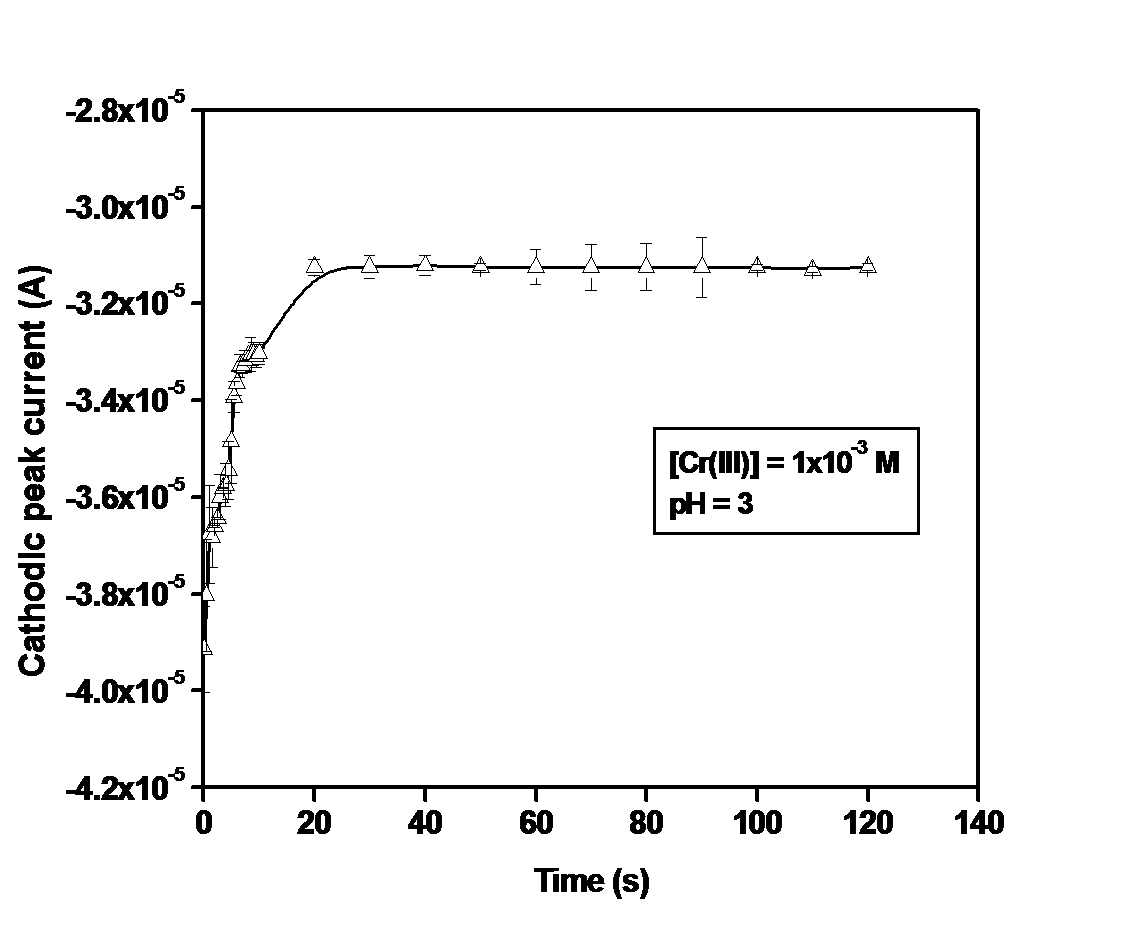


**(b)**

Figure S4. Effect of pre-concentration time on the cathodic peak current for (a) Cr(VI) ions and (b) Cr(III) ions

Figure S5

**
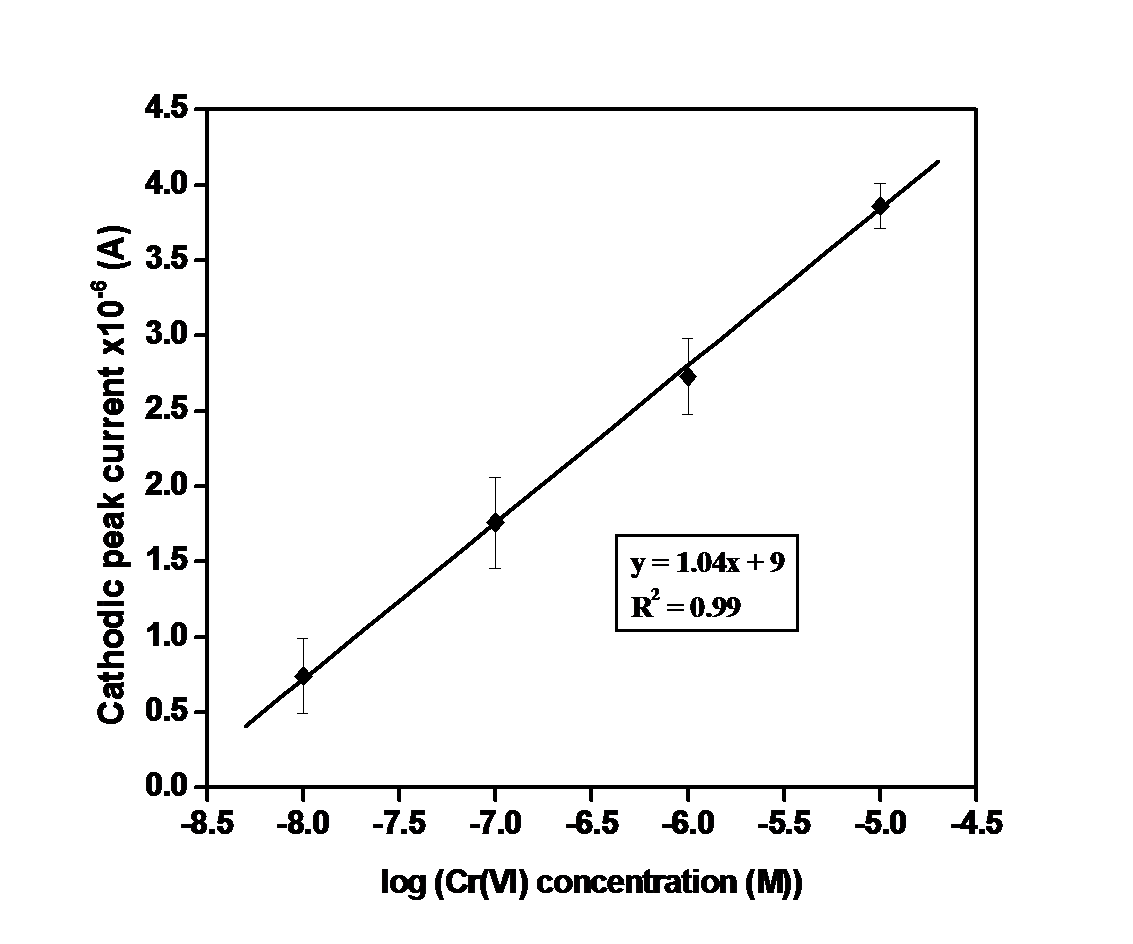
**

**(a)**


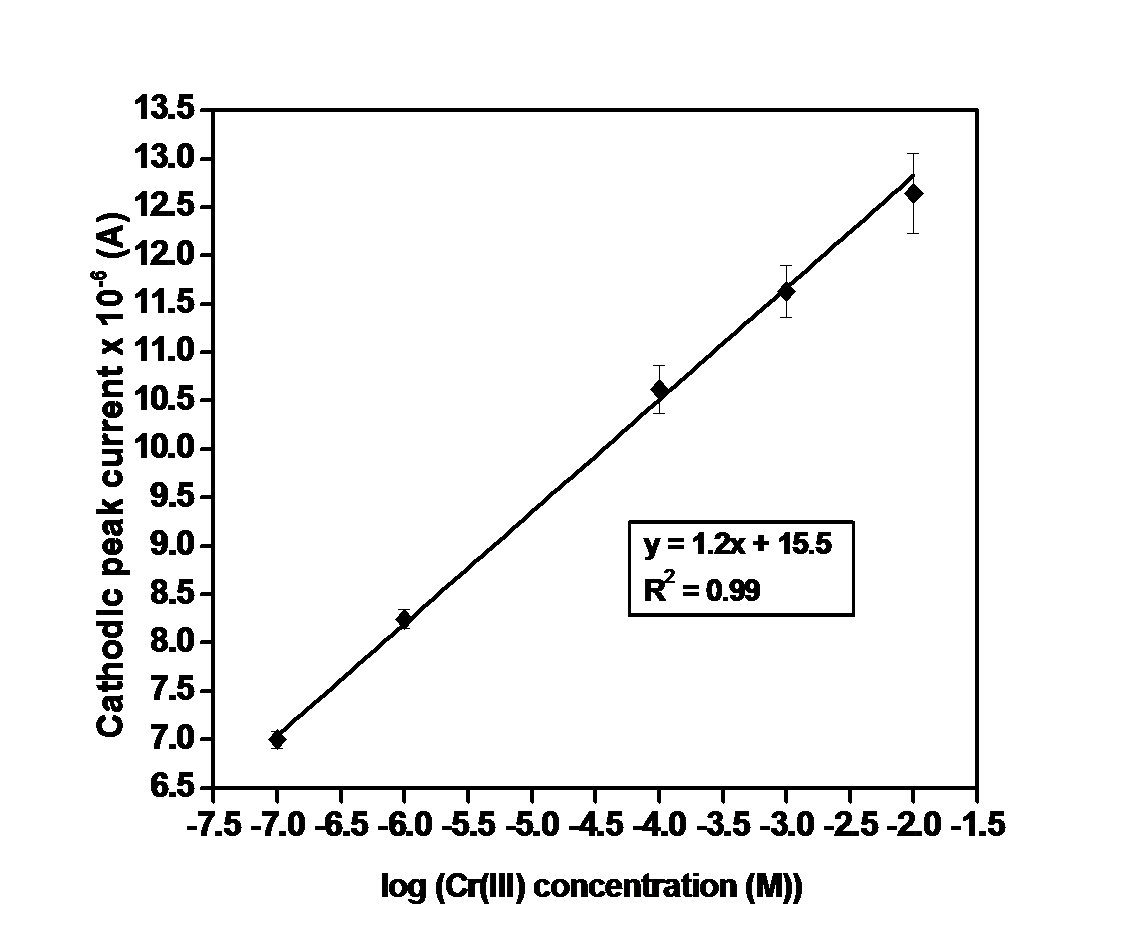


**(b)**

Figure S5. Calibration plot obtained using voltammetry using Sp-CPE for: (a) Cr(VI) ions and (b) Cr(III) ions
